# Supplementary material
Source: PubMed Central journal article supplement (PMC3031868)

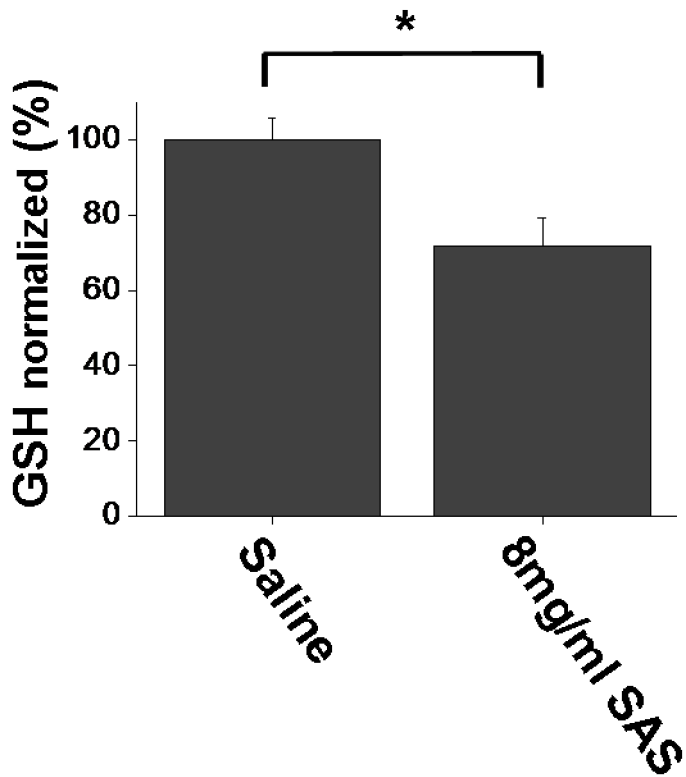

Supplement: NIHMS263378-supplement-figure.pdf [file NIHMS263378-supplement-figure.pdf]
